# Supplementary material for: Composite Anion Exchange Membranes Based on Quaternary Ammonium-Functionalized Polystyrene and Cerium(IV) Phosphate with Improved Monovalent-Ion Selectivity and Antifouling Properties
Source: MDPI journal article supplement (doi:10.3390/membranes13070624), 2023-06-26
Supplement: s1 [file s1]

# Supplementary Materials

## Composite Anion Exchange Membranes Based on Quaternary Ammonium-Functionalized Polystyrene and Cerium(IV) Phosphate with Improved Monovalent-Ion Selectivity and Antifouling Properties

Andrey Manin <sup>1,2</sup>, Daniel Golubenko <sup>1</sup>, Svetlana Novikova <sup>1,2</sup>, Andrey Yaroslavtsev <sup>1,\*</sup>

<sup>1</sup> Kurnakov Institute of General and Inorganic Chemistry RAS, Leninskii prospekt 31,  
Moscow 119071, Russia

<sup>2</sup> Faculty of Chemistry, National Research University Higher School of Economics, Vavilova  
str., 7, Moscow 119048, Russia

\*yaroslav@igic.ras.ru

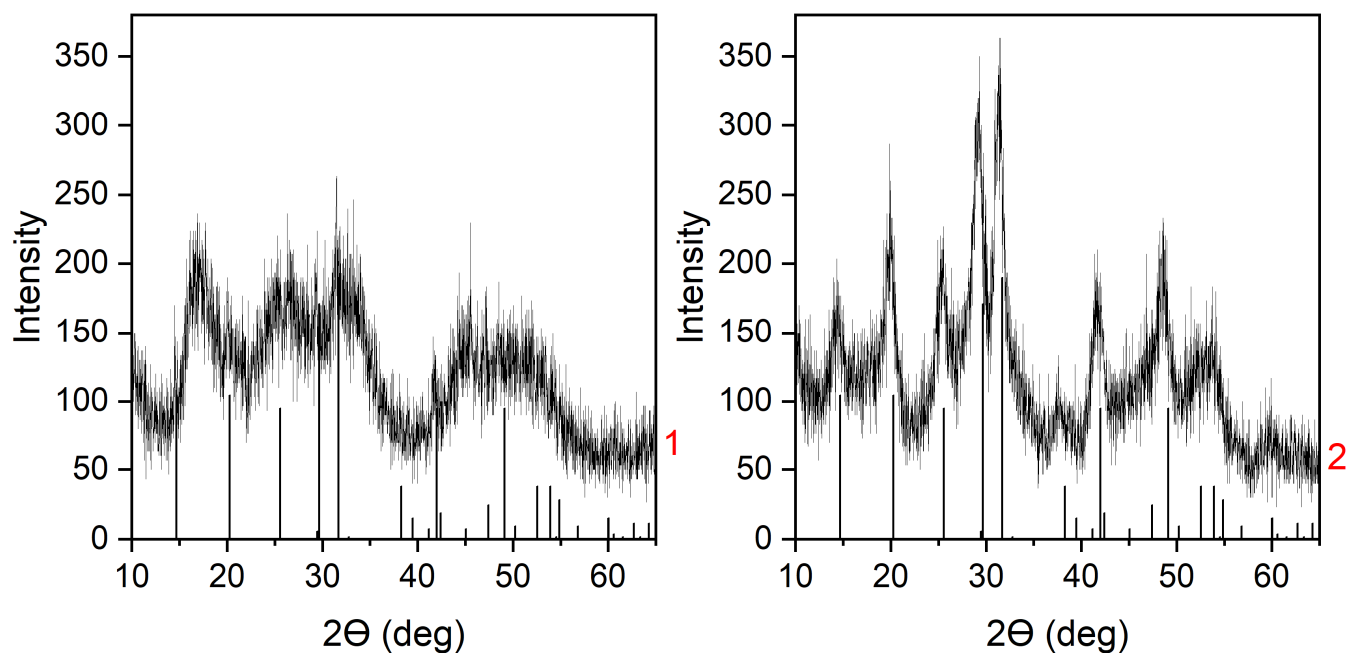

**Figure S1.** XRD pattern of (1) CeP-NH, (2) CeP-HP  
and reference diagram of CePO<sub>4</sub>·H<sub>2</sub>O (PDF-2 card No. 35-0614)

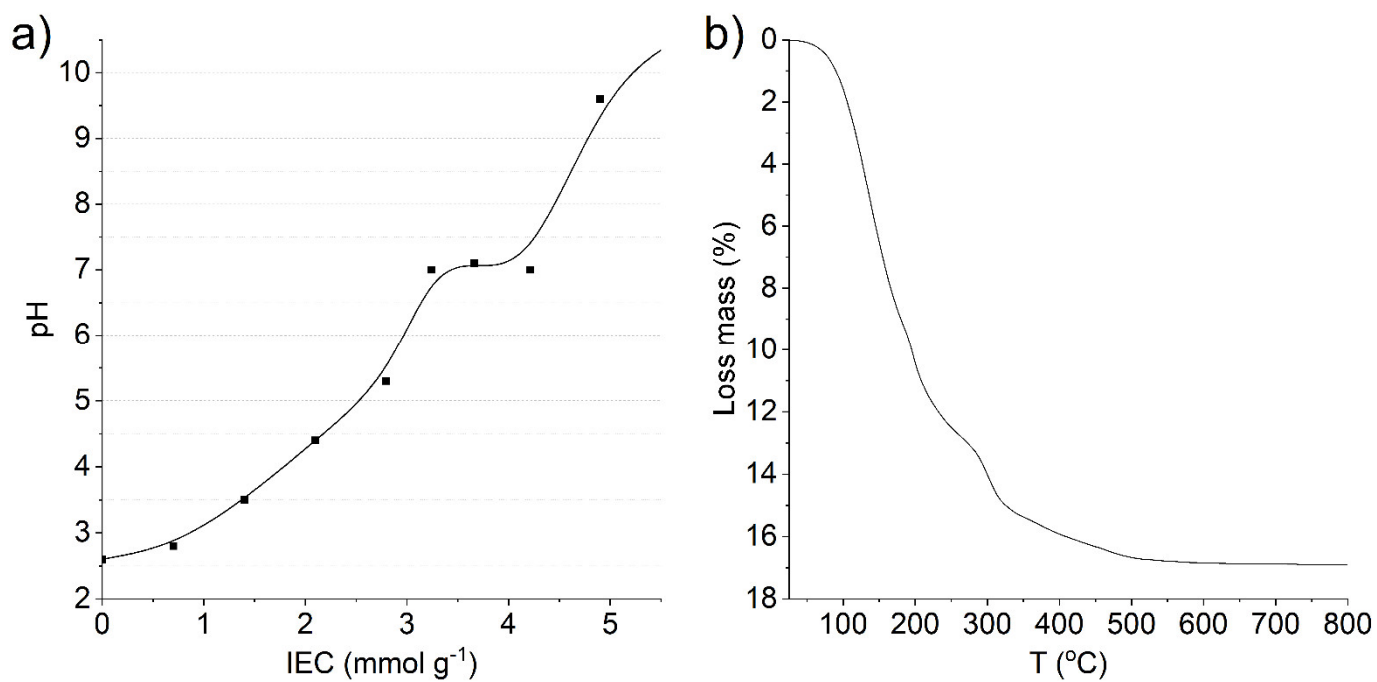

**Figure S2.** (a) Dependence of the ion exchange capacity of CeP-HP powder on pH and (b) mass loss vs. temperature for CeP-HP

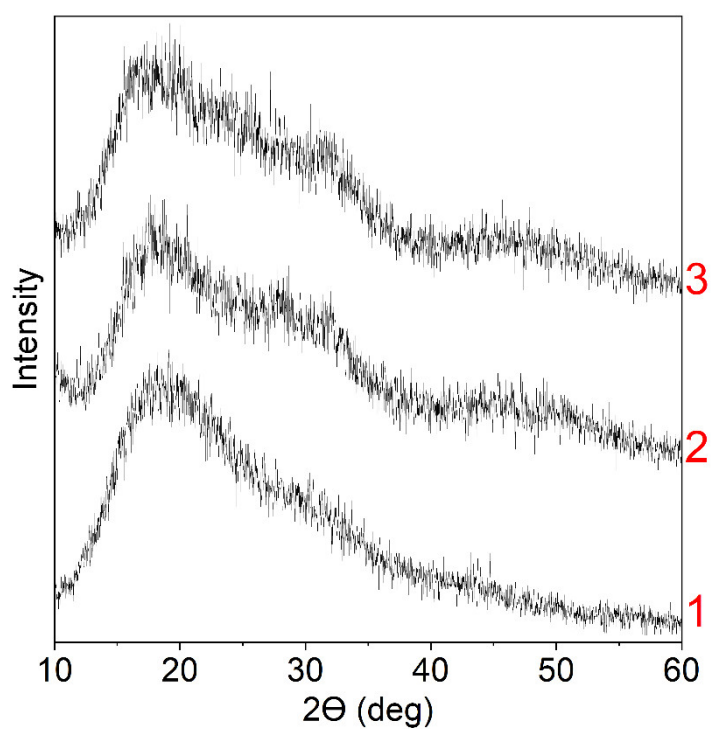

**Figure S3.** XRD pattern of (1) I-0, (2) I-15-NH, and (3) I-15-HP powders

**Table S1.** Absolute values of Cl/SO<sub>4</sub>-selectivity and fluxes and sources for different types of modification.

| Modification type                                                                           | C NaCl/<br>Na <sub>2</sub> SO <sub>4</sub> , M | J(Cl), nmole/(cm <sup>2</sup> *s) | Cl/SO <sub>4</sub> selectivity | Ref. |
|---------------------------------------------------------------------------------------------|------------------------------------------------|-----------------------------------|--------------------------------|------|
| Polydopamine (PDA) modified with amino-benzenesulfonic acid surface layer (FujiFilm AEM T1) | 0.05/0.05                                      | 12                                | 1.0 (pristine)                 | [1]  |
|                                                                                             |                                                | 20                                | 4.66                           |      |
|                                                                                             |                                                | 12                                | 0.6 (pristine)                 | [2]  |
|                                                                                             |                                                | 17                                | 1.0                            |      |
|                                                                                             |                                                | 22                                | 1.43                           |      |
| PDA with N-O-sulfonic acid benzyl chitosan surface layer (FujiFilm AEM)                     | 0.02/0.02                                      | 15                                | 0.8 (pristine)                 | [3]  |
|                                                                                             |                                                | 21                                | 1.3                            |      |
| Surface covalently bound polyethyleneimine (tailor-made, BPPO-based ionomer membrane)       | 0.05/0.05                                      | 15                                | 0.79 (pristine)                | [4]  |
|                                                                                             |                                                | 36                                | 4.27                           |      |
| LbL based on chitosan polyelectrolyte surface layer (FujiFilm AEM T1)                       | 0.05/0.05                                      | 30                                | 0.81 (pristine)                | [5]  |
|                                                                                             |                                                | 99                                | 47                             |      |
| LbL based on chitosan polycations and PS sulfonate (FujiFilm AEM T1)                        | 0.05/0.05                                      | 8.6                               | 0.39 (pristine)                | [6]  |
|                                                                                             |                                                | 36.2                              | 4.36                           |      |
| Cation exchange surface layer (MK-40, PS-based ionomer)                                     | 0.02/0.01                                      | 1.5                               | 0.3 (pristine)                 | [7]  |
|                                                                                             |                                                | 39                                | 1.0 (pristine)                 |      |
|                                                                                             |                                                | 0.42                              | 1.25                           |      |
|                                                                                             |                                                | 0.29                              | 2                              |      |
|                                                                                             |                                                | 0.10                              | 3.3                            |      |
| Amphoteric blend anion-exchange membranes (tailor-made)                                     | 0.05/0.05                                      | 31                                | 8.6 (pristine 20 min)          | [8]  |
|                                                                                             |                                                | 22                                | 6.5 (pristine 120 min)         |      |
|                                                                                             |                                                | 26                                | 9.2 (20 min)                   |      |
|                                                                                             |                                                | 20                                | 22 (120 min)                   |      |
| Di-quaternized graphene oxide cross-linking (tailor-made, PSU-based ionomer)                | 0.05/0.05                                      | 44                                | 2.01 (com)                     | [9]  |
|                                                                                             |                                                | 39                                | 1.7 (pristine)                 |      |
|                                                                                             |                                                | 64                                | 3.3                            |      |
|                                                                                             |                                                | 81                                | 4.6                            |      |
|                                                                                             |                                                | 83                                | 5.7                            |      |
| LbL based on polyallylamine and PS sulfonate surface layer (Neosepta AMX)                   | 0.01/0.01                                      | 5.8                               | 0.77 (pristine)                | [10] |
|                                                                                             |                                                | 6.7                               | 0.95                           |      |
|                                                                                             |                                                | 9.4                               | 1.7                            |      |
| LbL based on polyallylamine and PS sulfonate surface layer (FujiFilm AEM T1)                | 0.01/0.01                                      | 7.4                               | 1.3 (FujiFilm T1)              | [11] |
|                                                                                             |                                                | 6.7                               | 7.4                            |      |
| Surface sulfonated graft AEM (tailor-made, PS-based ionomer)                                | 0.02/0.02                                      | 16.2                              | 0.741 (pristine)               | [12] |
|                                                                                             |                                                | 30.6                              | 3.21                           |      |
|                                                                                             |                                                | 11.6                              | 5.26                           |      |
|                                                                                             | 0.05/0.05                                      | 24.7                              | 0.92 (pristine)                |      |
|                                                                                             | 0.1/0.1                                        | 96.5                              | 1.4 (pristine)                 |      |
|                                                                                             | 0.05/0.05                                      | 50.4                              | 3.6                            |      |
| BPPO with different tertiary amines and layer-by-layer modified                             | 0.01/0.01                                      | 21                                | 0.81                           | [14] |
|                                                                                             |                                                | 22                                | 1.4                            |      |

|                                                |           |     |                          |              |
|------------------------------------------------|-----------|-----|--------------------------|--------------|
|                                                |           | 29  | 1.8                      |              |
|                                                |           | 37  | 2.9                      |              |
|                                                |           | 35  | 5.0                      |              |
|                                                |           | 35  | 12                       |              |
|                                                |           | 30  | 3.8                      |              |
|                                                |           | 37  | 6.1                      |              |
|                                                |           | 38  | 5.0                      |              |
| CeP incorporation in Ralex AM and Neosepta AMX | 0.02/0.02 | 18  | 0.58(pristine Ralex)     | this<br>work |
|                                                |           | 20  | 0.67                     |              |
|                                                |           | 19  | 0.66 (pristine Neosepta) |              |
|                                                |           | 21  | 0.72                     |              |
|                                                | 0.5/0.5   | 137 | 4.0 (pristine Ralex)     |              |
|                                                |           | 137 | 4.9                      |              |
|                                                |           | 161 | 7.5 (pristine Neosepta)  |              |
|                                                |           | 163 | 7.7                      |              |

1. Zhao, Y.; Li, Y.; Yuan, S.; Zhu, J.; Houtmeyers, S.; Li, J.; Dewil, R.; Gao, C.; Van der Bruggen, B. A Chemically Assembled Anion Exchange Membrane Surface for Monovalent Anion Selectivity and Fouling Reduction. *Journal of Materials Chemistry A* **2019**, *7*, 6348–6356, doi:10.1039/C8TA11868J.

2. Zheng, Z.; Xiao, P.; Ruan, H.; Liao, J.; Gao, C.; Van der Bruggen, B.; Shen, J. Mussel-Inspired Surface Functionalization of AEM for Simultaneously Improved Monovalent Anion Selectivity and Antibacterial Property. *Membranes* **2019**, *9*, 36, doi:10.3390/membranes9030036.

3. Zhao, Y.; Liu, H.; Tang, K.; Jin, Y.; Pan, J.; der Bruggen, B.V.; Shen, J.; Gao, C. Mimicking the Cell Membrane: Bio-Inspired Simultaneous Functions with Monovalent Anion Selectivity and Antifouling Properties of Anion Exchange Membrane. *Scientific Reports* **2016**, *6*, 37285, doi:10.1038/srep37285.

4. Pan, J.; Ding, J.; Tan, R.; Chen, G.; Zhao, Y.; Gao, C.; der Bruggen, B.V.; Shen, J. Preparation of a Monovalent Selective Anion Exchange Membrane through Constructing a Covalently Crosslinked Interface by Electro-Deposition of Polyethyleneimine. *Journal of Membrane Science* **2017**, *539*, 263–272, doi:10.1016/j.memsci.2017.06.017.

5. Zhao, Y.; Zhu, J.; Ding, J.; Van der Brugge, B.; Shen, J.; Gao, C. Electric-Pulse Layer-by-Layer Assembled of Anion Exchange Membrane with Enhanced Monovalent Selectivity. *Journal of Membrane Science* **2018**, *548*, 81–90, doi:10.1016/j.memsci.2017.11.007.

6. Liu, H.; Ruan, H.; Zhao, Y.; Pan, J.; Sotito, A.; Gao, C.; van der Bruggen, B.; Shen, J. A Facile Avenue to Modify Polyelectrolyte Multilayers on Anion Exchange Membranes to Enhance

Monovalent Selectivity and Durability Simultaneously. *Journal of Membrane Science* **2017**, *543*, 310–318, doi:10.1016/j.memsci.2017.08.072.

7. Achoh, A.R.; Zabolotsky, V.I.; Lebedev, K.A.; Sharafan, M.V.; Yaroslavl'tsev, A.B. Electrochemical Properties and Selectivity of Bilayer Ion-Exchange Membranes in Ternary Solutions of Strong Electrolytes. *Membranes and Membrane Technologies* **2021**, *3*, 52–71, doi:10.1134/s2517751621010029.

8. Liao, J.; Chen, Q.; Pan, N.; Yu, X.; Gao, X.; Shen, J.; Gao, C. Amphoteric Blend Ion-Exchange Membranes for Separating Monovalent and Bivalent Anions in Electrodialysis. *Separation and Purification Technology* **2020**, *242*, 116793, doi:10.1016/j.seppur.2020.116793.

9. Goel, P.; E., B.; Mandal, P.; Shahi, V.K.; Bandyopadhyay, A.; Chattopadhyay, S. Di-Quaternized Graphene Oxide Based Multi-Cationic Cross-Linked Monovalent Selective Anion Exchange Membrane for Electrodialysis. *Separation and Purification Technology* **2021**, *276*, 119361, doi:10.1016/j.seppur.2021.119361.

10. Mulyati, S.; Takagi, R.; Fujii, A.; Ohmukai, Y.; Matsuyama, H. Simultaneous Improvement of the Monovalent Anion Selectivity and Antifouling Properties of an Anion Exchange Membrane in an Electrodialysis Process, Using Polyelectrolyte Multilayer Deposition. *Journal of Membrane Science* **2013**, *431*, 113–120, doi:10.1016/j.memsci.2012.12.022.

11. Ahmad, M.; Tang, C.; Yang, L.; Yaroshchuk, A.; Bruening, M.L. Layer-by-Layer Modification of Aliphatic Polyamide Anion-Exchange Membranes to Increase Cl<sup>-</sup>/SO<sub>4</sub><sup>2-</sup> Selectivity. *Journal of Membrane Science* **2019**, *578*, 209–219, doi:10.1016/j.memsci.2019.02.018.

12. Golubenko, D.V.; Yaroslavl'tsev, A.B. Effect of Current Density, Concentration of Ternary Electrolyte and Type of Cations on the Monovalent Ion Selectivity of Surface-Sulfonated Graft Anion-Exchange Membranes: Modelling and Experiment. *Journal of Membrane Science* **2021**, *635*, 119466, doi:10.1016/j.memsci.2021.119466.

13. Golubenko, D.V.; Manin, A.D.; Wang, Y.; Xu, T.; Yaroslavl'tsev, A.B. The Way to Increase the Monovalent Ion Selectivity of FujiFilm® Anion-Exchange Membranes by Cerium Phosphate Modification for Electrodialysis Desalination. *Desalination* **2022**, *531*, 115719, doi:10.1016/j.desal.2022.115719.

14. Tekinalp, Ö.; Zimmermann, P.; Burheim, O.S.; Deng, L. Designing Monovalent Selective Anion Exchange Membranes for the Simultaneous Separation of Chloride and Fluoride from Sulfate in an Equimolar Ternary Mixture. *Journal of Membrane Science* **2023**, *666*, doi:10.1016/j.memsci.2022.121148.
